# Supplementary material for: Promoting healthy diet and movement in UK preschoolers: Evidence-based co-development of health promotion materials
Source: Research Square preprint supplement (doi:10.21203/rs.3.rs-7991594/v1), 2025-11-06
Supplement: Supplementary file 1 [file 34187a2575cd25d9d2d7abf6.docx]

**Supplementary material 1 – links to animations**

<https://www.youtube.com/watch?v=5Oqcds4b8fQ>

<https://www.youtube.com/watch?v=6phxvIbWUYI>

<https://www.youtube.com/watch?v=N9cRGkpmznI>

<https://www.youtube.com/watch?v=tj4Tfqr64R0>
